# Supplementary material
Source: publisher figshare collection journal article supplement (https://gsapubs.figshare.com/ndownloader/files/23295590)
Supplement: Supplementary file 1 [file 23295590]

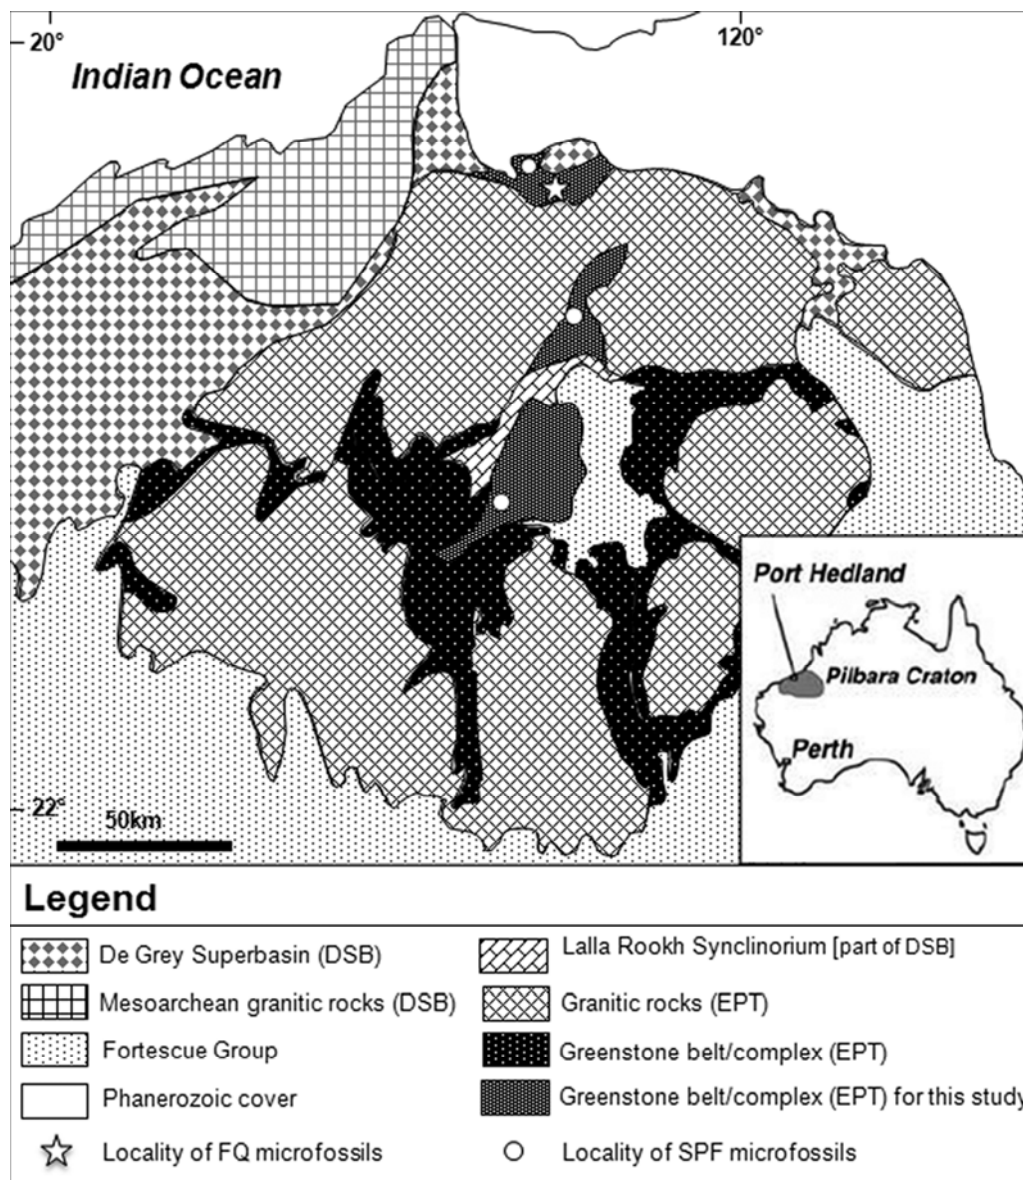

**Figure DR1.** Location Map for Farrel Quartzite in the Pilbara Craton of northwestern Australia (inset shows location of Pilbara Craton in Australia). Map shows geology of northeastern part of the Pilbara Craton (after Hickman, 2008). DSB and EPT in the legend indicate De Grey Superbasin and East Pilbara Terrane, respectively. A: Panorama greenstone belt; B: Warralong greenstone belt; C: Goldsworthy greenstone belt. Localities for SPF samples with similar microfossils are shown for comparison.

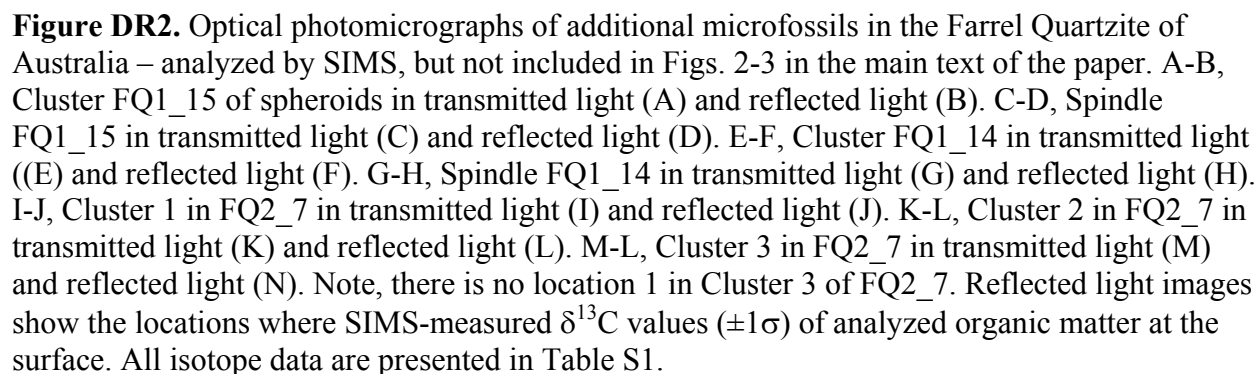

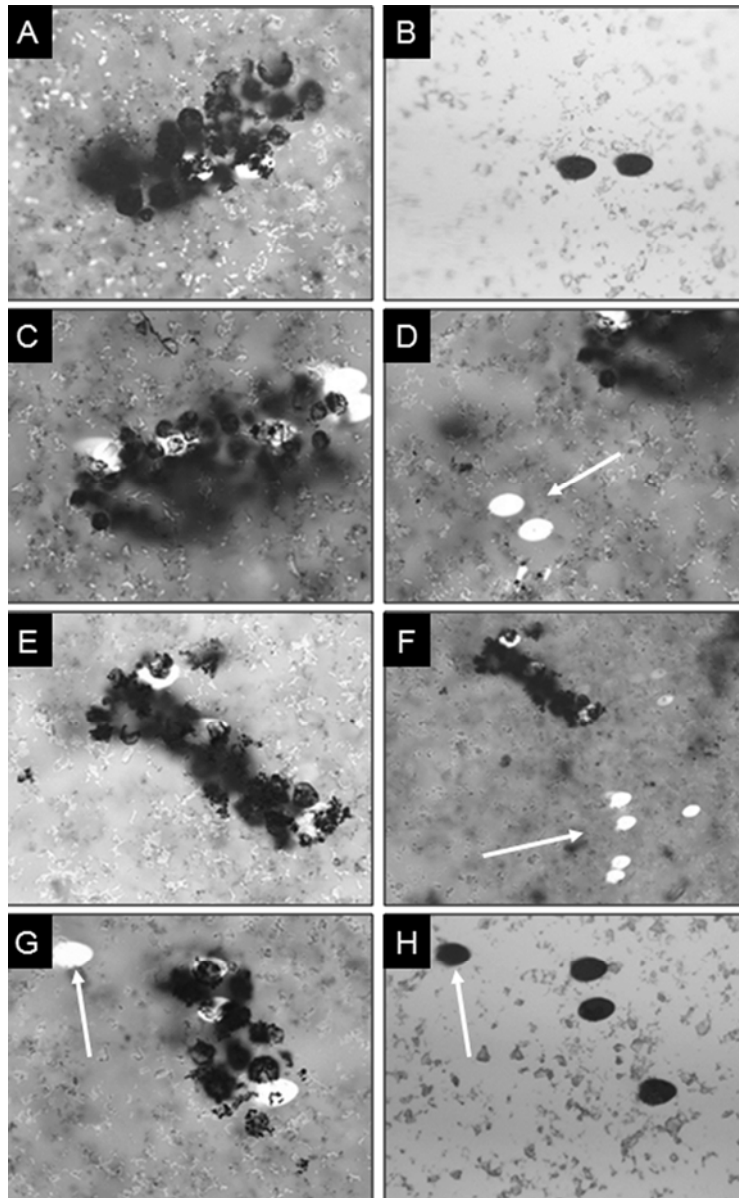

**Figure DR3.** Optical photomicrographs of spheroidal structures analyzed by SIMS (and illustrated in Fig. 1 of the paper), illustrating SIMS spot sizes, locations of analysis within microfossils, and examples of locations for background analyses. A, C-G are transmitted light micrographs. B and H are the reflected light micrographs of the clusters of spheroids in A and G, respectively. In transmitted light, the SIMS spots generally appear as bright white ovals. In reflected light, the SIMS spots are dark ovals. The reflected light images are helpful for locating the SIMS spots in cases where they may be obscured by the carbonaceous material of the microfossil in transmitted light (see especially the comparison between A and B); that occurs when the SIMS analysis did not penetrate the entire depth of the carbonaceous microfossil (since the transmitted light source shines through the thin section from the bottom to the top). D, F, G and H show some of the SIMS analysis locations that were beyond the clusters of spheroids (arrows) and taken to represent background organic material. D shows background SIMS locations off the lower right end of the cluster in C.

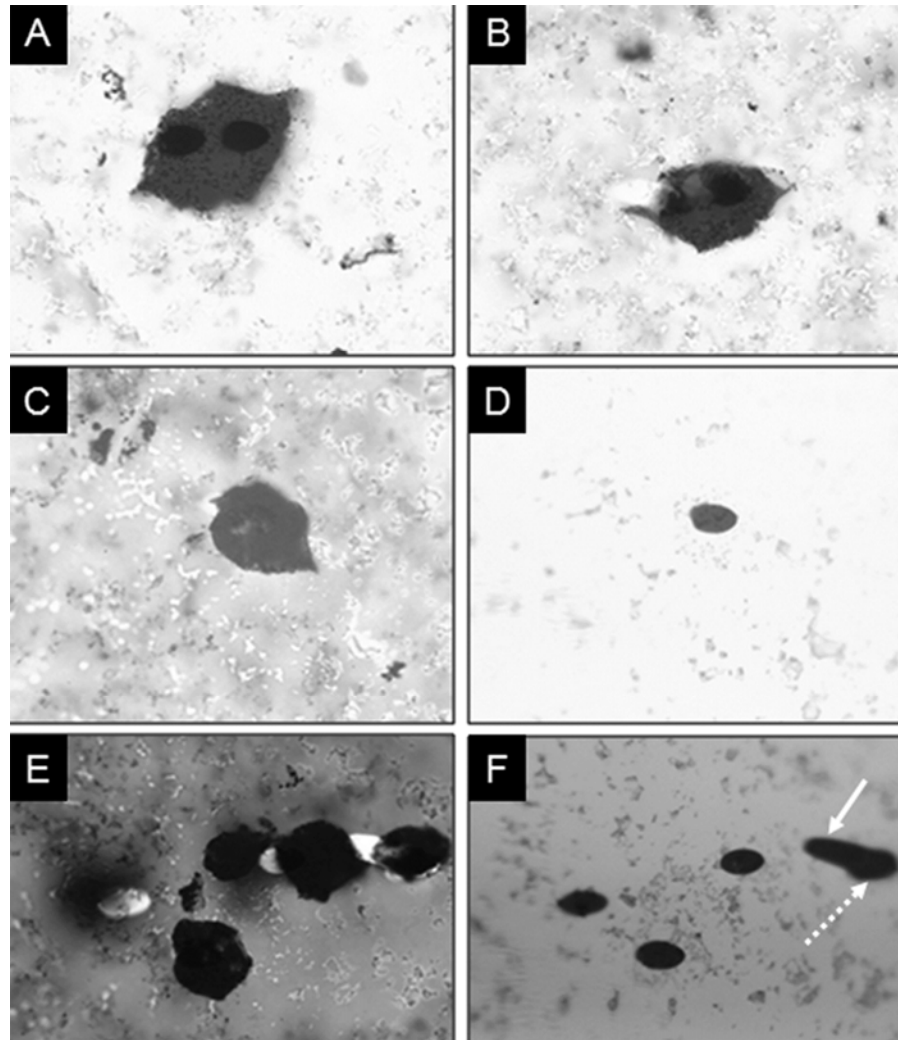

**Figure DR4.** Optical photomicrographs of spindle-shaped structures analyzed by SIMS (and illustrated in Fig. 2 of the paper), illustrating SIMS spot sizes, locations of analysis within microfossils, and examples of locations for background analyses. A-C, and E are transmitted light micrographs. D and F are the reflected light micrographs of the spindles in C and E, respectively. In transmitted light, the SIMS spots are bright white ovals, except where they are obscured by the carbonaceous material of the spindle (e.g., in A - C). In those cases, the SIMS spots look like dark ovals; that occurs when the SIMS analysis did not penetrate the entire depth of the spindle (since the transmitted light source shines through the thin section from the bottom to the top). In reflected light, the SIMS spots are dark ovals and can be readily seen when they are obscured by the spindle in transmitted light (compare C and D). Solid white arrow in F shows a SIMS spot that missed the spindles, as the center of the analysis spot is between spindles. Dashed arrow in F shows SIMS pot that analyzed the farthest spindle to the right in E.

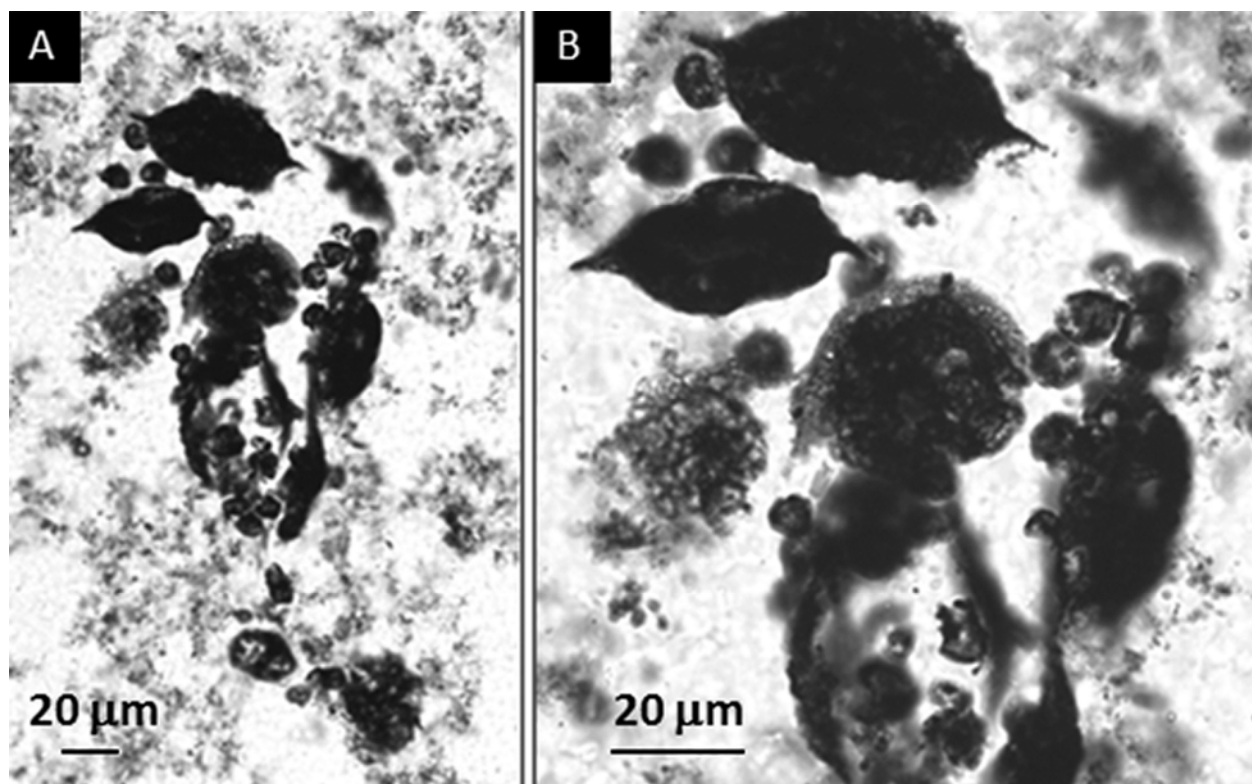

**Figure DR5.** In exceptional cases, small non-clustered FQ spheres appear to be related and encased and in the large spindle structures. Wide-field (A) and close-up (B) optical image showing mixture of spindles and small spheres. Scale bar is 20  $\mu\text{m}$ .

TABLE DR1.  $\delta^{13}\text{C}$  VALUES FOR FQ MICROSTRUCTURES AND BACKGROUND SPOTS

| Sample ID       | Description          | $\delta^{13}\text{C}$ | $\pm\sigma_P$ | $\pm\sigma_T$ | Cs <sup>+</sup> (nA) | C <sub>2</sub> (cps) | Notes                                                                     |
|-----------------|----------------------|-----------------------|---------------|---------------|----------------------|----------------------|---------------------------------------------------------------------------|
| FQ1_4_spchn1    | Spindle              | -40.5                 | 0.7           | 1.2           | 0.03                 | 6.3E+05              | Chain of spindles. Location 1, imaged in Figs. 2E-F.                      |
| FQ1_4_spchn3    | Spindle              | -38.4                 | 0.7           | 1.2           | 0.03                 | 2.5E+05              | Chain of spindles. Location 3, imaged in Figs. 2E-F.                      |
| FQ1_4_spchn4    | Spindle              | -37.2                 | 0.8           | 1.3           | 0.03                 | 2.0E+05              | Chain of spindles. Location 4, imaged in Figs. 2E-F.                      |
| FQ1_4_bkgd@1    | Background           | -38.3                 | 2.1           | 2.3           | 0.03                 | 8.1E+03              | Location 1, near spindle chain, FQ1_4.                                    |
| Bk2_only20cyles | Background           | -40.3                 | 5.2           | 5.3           | 0.03                 | 1.7E+04              | Location 1a, near spindle chain, FQ1_4.                                   |
| FQ1_4_spchn_bk2 | Background           | -31.8                 | 1.2           | 1.6           | 0.41                 | 9.2E+04              | Location 2, near spindle chain, FQ1_4.                                    |
| FQ1_4_spchn_5   | Spindle              | -36.3                 | 0.6           | 1.2           | 0.05                 | 5.2E+04              | Chain of spindles. Location 5, imaged in Figs. 2E-F.                      |
| FQ1_15_uni_1    | Cluster of spheroids | -33.8                 | 0.7           | 1.2           | 0.06                 | 2.6E+05              | Location 1 within cluster of FQ1_15, imaged in Supplementary Figs. 2A-B.  |
| FQ1_15_uni_2    | Cluster of spheroids | -35.0                 | 0.8           | 1.3           | 0.04                 | 2.4E+05              | Location 2 within cluster of FQ1_15, imaged in Supplementary Figs. 2A-B.  |
| FQ1_15_sp       | Spindle              | -35.6                 | 1.2           | 1.6           | 0.04                 | 2.1E+05              | Single spindle near cluster (FQ1_15), imaged in Supplementary Figs. 2C-D. |
| FQ1_11_uni_1    | Cluster of spheroids | -38.3                 | 0.7           | 1.2           | 0.03                 | 5.7E+05              | Location 1 in cluster FQ1_11, imaged in Figs. 1A-B.                       |
| FQ1_11_uni_2    | Cluster of spheroids | -38.6                 | 0.7           | 1.2           | 0.03                 | 5.9E+05              | Location 2 in cluster FQ1_11, imaged in Figs. 1A-B.                       |
| FQ1_14_bk       | Background           | -28.5                 | 1.7           | 2.0           | 0.41                 | 3.3E+04              | Location 1, near spindle FQ1-14 of line 17.                               |
| FQ1_14_sp       | Spindle              | -35.6                 | 1.0           | 1.4           | 0.03                 | 2.8E+05              | Single spindle near cluster (FQ1_14), imaged in Supplementary Figs. 2G-H. |
| FQ1_14_bk2      | Background           | -33.5                 | 1.6           | 1.9           | 0.41                 | 4.8E+04              | Location 2, near cluster FQ1-14 of lines 20-21.                           |
| FQ1_14_bk3      | Background           | -28.5                 | 2.5           | 2.7           | 0.40                 | 5.0E+04              | Location 3, near cluster FQ1-14 of lines 20-21.                           |
| FQ1_14_uni1     | Cluster of spheroids | -34.8                 | 0.9           | 1.3           | 0.03                 | 3.8E+05              | Location 1 within cluster FQ1_14, imaged in Supplementary Figs. 2E-F.     |
| FQ1_14_uni2     | Cluster of spheroids | -34.3                 | 1.0           | 1.4           | 0.03                 | 5.0E+05              | Location 2 within cluster FQ1_14, imaged in Supplementary Figs. 2E-F.     |
| FQ1_10_bk       | Background           | -29.8                 | 3.9           | 4.0           | 0.40                 | 8.0E+03              | Location away from microstructures.                                       |
| FQ1_3_bk        | Background           | -33.2                 | 11.0          | 11.0          | 0.39                 | 9.6E+02              | Location away from microstructures.                                       |
| FQ2_7_bk1       | Background           | -32.7                 | 1.2           | 1.5           | 0.45                 | 1.1E+05              | Location 1, in vicinities of clusters of FQ2_7.                           |
| FQ2_7_uni_ex    | Cluster of spheroids | -34.6                 | 1.0           | 1.4           | 0.08                 | 2.5E+05              | Location 1 in cluster 1 of FQ2_7, imaged in Supplementary Figs. 2I-J.     |
| FQ2_7_uni_ex2   | Cluster of spheroids | -44.2                 | 0.9           | 1.3           | 0.03                 | 1.6E+05              | Location 2 in cluster 1 of FQ2_7, imaged in Supplementary Figs. 2I-J.     |
| FQ2_7_uni_ex3   | Cluster of spheroids | -40.6                 | 0.6           | 1.1           | 0.05                 | 4.6E+05              | Location 3 in cluster 1 of FQ2_7, imaged in Supplementary Figs. 2I-J.     |
| FQ2_7_uni_ex4   | Cluster of spheroids | -41.9                 | 0.9           | 1.3           | 0.06                 | 3.3E+05              | Location 4 in cluster 1 of FQ2_7, imaged in Supplementary Figs. 2I-J.     |
| FQ2_7_uni_bk2   | Background           | -34.2                 | 2.5           | 2.7           | 0.10                 | 3.6E+04              | Location 2, in vicinities of clusters of FQ2_7.                           |
| FQ2_7_uni_bk3   | Background           | -26.0                 | 5.5           | 5.6           | 0.45                 | 4.2E+03              | Location 3, in vicinities of clusters of FQ2_7.                           |
| FQ2_7_uni1_bk   | Background           | -31.8                 | 1.0           | 1.4           | 0.05                 | 2.8E+05              | Location near Cluster 2 of FQ2_7.                                         |
| FQ2_7_uni2      | Cluster of spheroids | -34.0                 | 0.7           | 1.2           | 0.08                 | 3.0E+05              | Location 2 in cluster 2 of FQ2_7, imaged in Supplementary Figs. 2K-L.     |
| FQ2_7_uni3      | Cluster of spheroids | -34.1                 | 0.9           | 1.3           | 0.07                 | 3.4E+05              | Location 3 in cluster 2 of FQ2_7, imaged in Supplementary Figs. 2K-L.     |
| FQ2_5_uni1      | Cluster of spheroids | -41.9                 | 1.4           | 1.7           | 0.05                 | 8.3E+04              | Location 1 in cluster of FQ2_5, imaged in Figs. 1C-D.                     |
| FQ2_5_uni2      | Cluster of spheroids | -37.3                 | 0.9           | 1.4           | 0.06                 | 2.9E+05              | Location 2 in cluster of FQ2_5, imaged in Figs. 1C-D.                     |
| FQ2_5_uni3      | Cluster of spheroids | -36.2                 | 0.8           | 1.3           | 0.08                 | 3.4E+05              | Location 3 in cluster of FQ2_5, imaged in Figs. 1C-D.                     |
| FQ2_5_sp1       | Spindle              | -36.0                 | 0.6           | 1.2           | 0.04                 | 4.0E+05              | Location 1 in single spindle of FQ2_5, imaged in Figs. 2A-B.              |
| FQ2_5_sp2       | Spindle              | -36.4                 | 0.8           | 1.3           | 0.13                 | 4.3E+05              | Location 2 in single spindle of FQ2_5, imaged in Figs. 2A-B.              |
| FQ2_6_sp1       | Spindle              | -35.8                 | 0.9           | 1.3           | 0.04                 | 3.0E+05              | Location 1 in single spindle of FQ2_6, imaged in Figs. 2C-D.              |
| FQ2_6_sp2       | Spindle              | -36.7                 | 0.9           | 1.3           | 0.05                 | 3.1E+05              | Location 2 in single spindle of FQ2_6, imaged in Figs. 2C-D.              |
| FQ2_8_uni1      | Cluster of spheroids | -34.9                 | 1.0           | 1.4           | 0.04                 | 2.1E+05              | Location 1 in cluster of FQ2_8, imaged in Figs. 1E-F.                     |
| FQ2_8_uni1b     | Cluster of spheroids | -36.8                 | 1.0           | 1.4           | 0.14                 | 2.6E+05              | Location 2 in cluster of FQ2_8, imaged in Figs. 1E-F.                     |
| FQ2_8_uni1c     | Cluster of spheroids | -35.0                 | 1.1           | 1.5           | 0.04                 | 1.9E+05              | Location 3 in cluster of FQ2_8, imaged in Figs. 1E-F.                     |
| FQ2_8_uni1_bk   | Background           | -30.3                 | 2.5           | 2.7           | 0.24                 | 4.4E+04              | Location near the cluster of FQ2_8.                                       |
| FQ2_9_uni1      | Cluster of spheroids | -34.4                 | 0.8           | 1.3           | 0.03                 | 4.7E+05              | Location 1 in cluster of FQ2_9, imaged in Figs. 1G-H.                     |
| FQ2_9_uni2      | Cluster of spheroids | -44.2                 | 0.9           | 1.3           | 0.04                 | 2.7E+05              | Location 2 in cluster of FQ2_9, imaged in Figs. 1G-H.                     |
| FQ2_9_uni3      | Cluster of spheroids | -35.2                 | 0.9           | 1.3           | 0.04                 | 3.1E+05              | Location 3 in cluster of FQ2_9, imaged in Figs. 1G-H.                     |
| FQ2_9_uni_bk    | Background           | -34.0                 | 0.6           | 1.1           | 0.04                 | 6.2E+05              | Location near cluster of FQ2_9.                                           |

Notes:  $\sigma_P$  refers to "primary" uncertainty which here combines in quadrature the internal percision of each analysis with the uncertainty of the instrumental mass factionation (IMF).

$\sigma_P = [(internal\ percision)^2 + (IMF\ uncertainty)^2]^{0.5}$ , where IMF uncertainty is the standard error on the mean IMF calculated for each day of SIMS work (in this case  $\pm 0.3\text{‰}$ ).

$\sigma_T$  refers to a "total" uncertainty, which here combines the  $\sigma_P$  in quadrature with an additional 1‰ standard error approximating the spot-to-spot reproducibility. This term was estimated from the 32 individual analyses of the 215-1 chert standard over the two days. These analyses had an initial Mean Square Weighted Deviation (MSWD) = 1.8. With a 1‰ spot-to-spot uncertainty added in quadrature to the internal percision of each analysis of 215-1, the new MSWD = 1, a value which shows the new total uncertainty matches the variance of the data points. While a spot-to-spot uncertainty of about 1‰ is quite reasonable for SIMS, it may be an overestimation here because repeated analyses of two potential standards (1:1:8 mixes of silica, carbon, and ordinary portland cement) showed no detectable spot-to-spot variation (n = 4; MSWD = 0.1 and n = 5; MSWD = 0.7). For this reason, we have decided to list both estimations of uncertainty in the table, while using the more concervative  $\sigma_T$  in the text of the paper. While these cement mixes being tested did show good isotopic homogeneity and yielded good spot-to-spot reproducibility, they were not suitable as a standard because the IMF was found to be quite different than chert (IMF =  $21.4 \pm 1.1\text{‰}$  for silica, graphite, and cement; IMF =  $20.8 \pm 0.9\text{‰}$  for silica, coal, and cement; compared with IMF =  $-5.6 \pm 0.3\text{‰}$  for chert PPRG#215-1).

$IMF\ (‰) = 1000 * \ln [(\delta_{exp} + 1000)/(\delta_{obs} + 1000)]$   
 $MSWD = \sum [(X_{wm} - X_i)^2 / s_i^2] / (n-1)$ , where  $X_{wm}$  = weighted mean of  $X_i$ ,  $\sigma_i$  = standard error in measurement of  $X_i$ , and n = # of measurements.  
 $\sigma_T = [(\sigma_P)^2 + (spot-to-spot)^2]^{0.5}$ , where spot-to-spot is equal to 1‰ for the work reported here.

A long analysis of the PPRG#215–1 chert at low primary ion beam intensity demonstrated an IMF consistent with our the other analyses of this standard, in line with past SIMS experience using the same conditions. This result, plus the fact that the weighted linear regression of the analyses of PPRG#215–1 as a function of primary ion beam intensity demonstrated no significant slope ( $\approx -0.5\text{‰}$  per nA), indicates that our overall estimate of IMF is accurate (to a couple of per mil) for all of the FQ results.

Under the conditions used, quasi-simultaneous arrival (QSA) effects are expected to be small because the production of  $C_2^-$  is relatively ineffective with ionization around a few percent where carbon is exposed, and to be very similar between the standard chert and the Farrel Quartzite chert because of their similar elemental chemistry. The lack of a QSA isotope effect is supported by analyses of the chert standard, which were consistent over a factor of >5-fold variation in the ratio of secondary ions produced to primary ion current.

Cs<sup>+</sup>(nA) is the current of the primary ion beam used.

C<sub>2</sub> (cps) is the detected counts per second for the secondary beam of C<sup>2</sup> ions.
